# Supplementary material for: Establishment and validation of an RNA binding protein-associated prognostic model for ovarian cancer
Source: PubMed Central journal article supplement (PMC7869493; doi:10.1186/s13048-021-00777-1), 2021-02-07
Supplement: 13048_2021_777_MOESM1_ESM.pdf [file 13048_2021_777_MOESM1_ESM.pdf]

# Figure S1

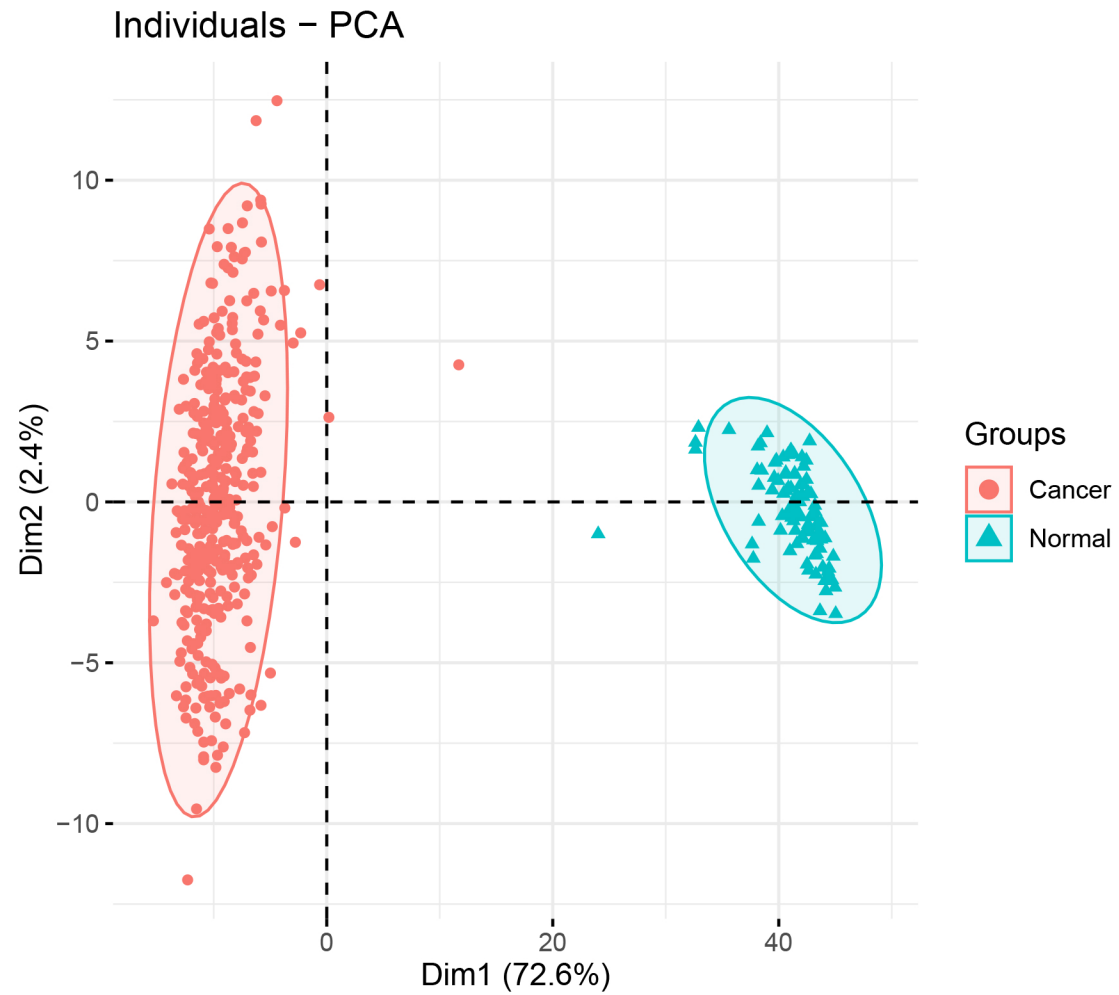

Figure S1: Principal component analysis of ovarian cancer samples in the TCGA-GTEX data set
