# Supplementary material for: Establishment and validation of an RNA binding protein-associated prognostic model for ovarian cancer
Source: PubMed Central journal article supplement (PMC7869493; doi:10.1186/s13048-021-00777-1), 2021-02-07
Supplement: 13048_2021_777_MOESM3_ESM.pdf [file 13048_2021_777_MOESM3_ESM.pdf]

# Figure S3

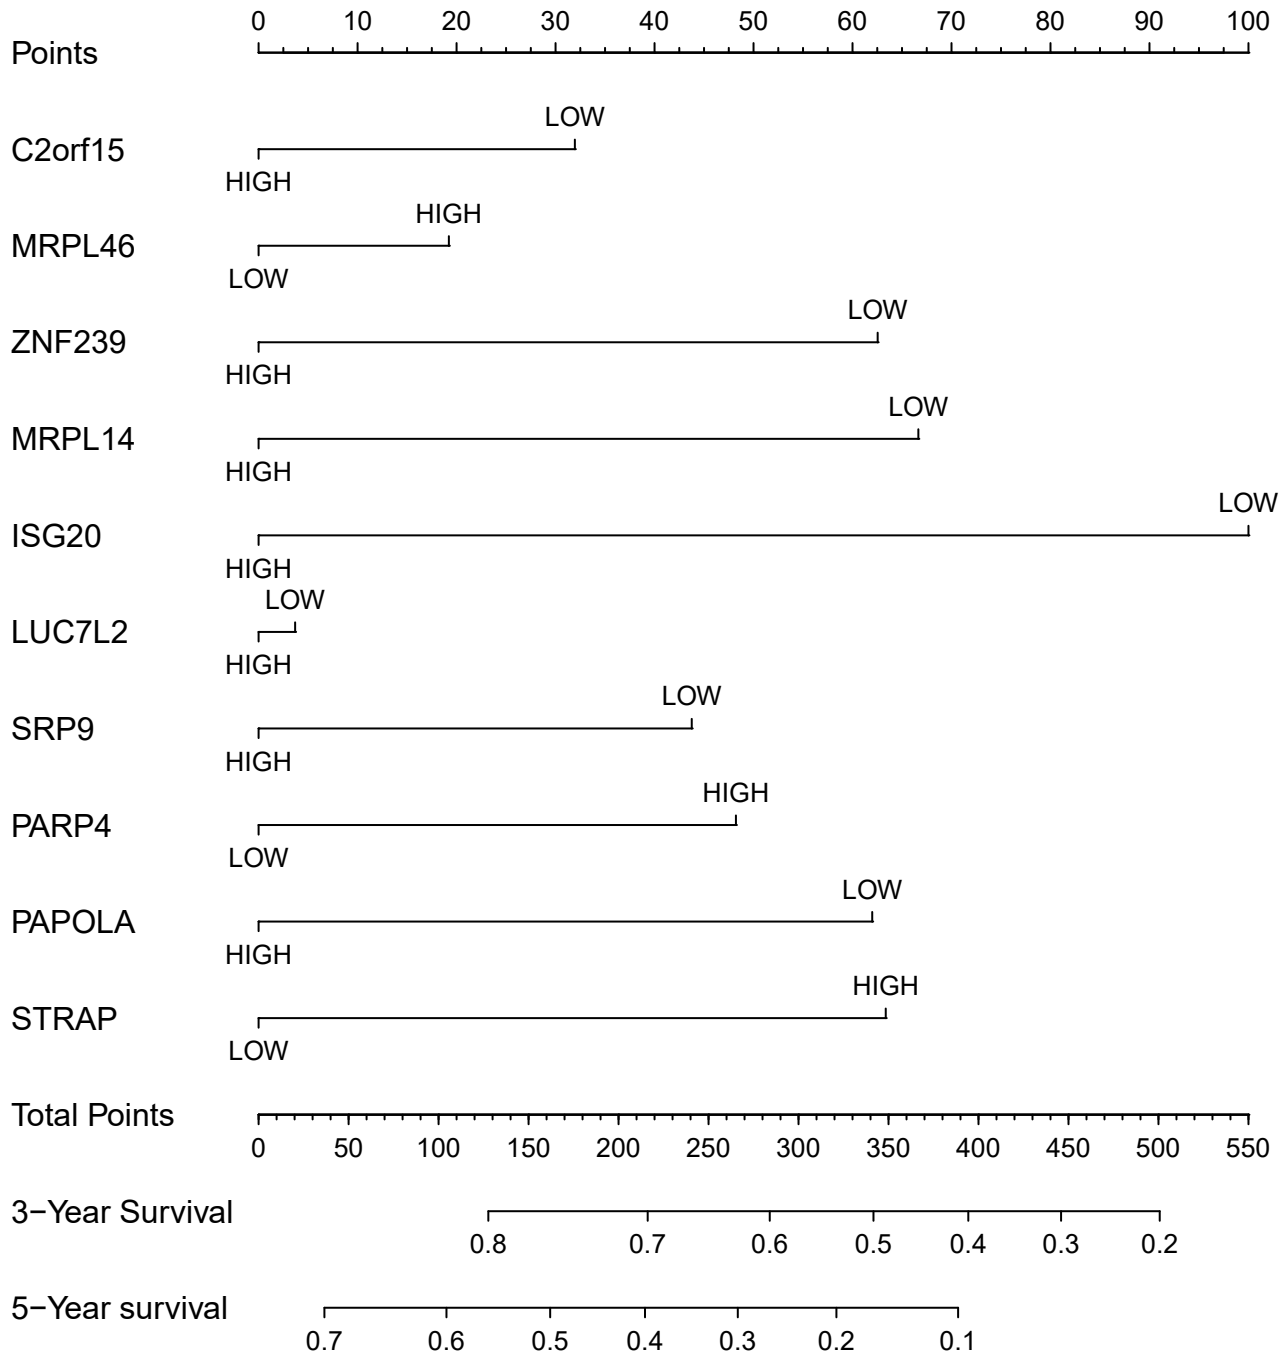

**Figure S3: Nomogram for predicting 3-, and 5-year Overall Survival of ovarian cancer patients in the TCGA cohort.**
